# Supplementary material for: Transcriptome Analysis of Apple Leaves in Response to Powdery Mildew (Podosphaera leucotricha) Infection
Source: MDPI journal article supplement (doi:10.3390/ijms20092326), 2019-05-10
Supplement: s1 [file s1]

**Table S1 Genes and primer pairs used for quantitative real-time PCR**

| <b>Gene function annotation</b> | <b>Gene ID</b> | <b>Forward primer (5'→3')</b> | <b>Reverse primer (5'→3')</b> |     |
|---------------------------------|----------------|-------------------------------|-------------------------------|-----|
| BAK1                            | MD15G1413300   | AACCCAAGACGGGGAAGTAC          | CCGGACGACCTCTTAAACAA          | 172 |
| BSK                             | MD13G1213100   | TTTTGATTCCCCAAATTCCA          | TGCAAAAACAGAGACGCTTG          | 186 |
| BZK1/2                          | MD15G1031900   | CGATACTTCCACCGCAGATT          | CGTGAGCTCCAAGTCATCAA          | 204 |
| TCH4                            | MD13G1268900   | TGGTGGTCTTCGGGTCTAC           | GTTGCTGGCAGTGCATTCTA          | 191 |
| CNGCs                           | MD07G1292900   | ATGTGGCTGCAAATACCACA          | CACATATTCAGCGCCTCTCA          | 226 |
| CaM/CML                         | MD12G1194200   | GCCTCAACTTCGACGACTTC          | AGCACCACTGCAACTCTTT           | 232 |
| CDPK                            | MD07G1063300   | GACAGGGGCAGTTTGAATA           | AGAGCTCACCTCCTGCACAT          | 239 |
| Rboh                            | MD13G1134500   | CTCGAGCCATAACAACAGCA          | ACACCCTTCTCGTCCATGTC          | 155 |
| β-1,3-glucanase                 | MD13G1181800   | CCGTCCTTCTCGTCTCTGAC          | CCGATTGCAGAAACACCTTT          | 143 |
| Dehydrin                        | MD02G1139900   | GGAGGAAGAAGAAGGGGTTG          | TTGAGTAGTGGGGGTCATCC          | 186 |
| PR1                             | MD05G1109100   | CTTGACGTGGGATGACAATG          | TACGCCAAACCACCTGTGTA          | 21  |
| PR14                            | MD11G1054100   | GGAGTGTTTGGAGGCACAGT          | AGGACAAGGAGAGCCACAGA          | 186 |
| MdTubulin                       |                | AGGATGCTACAGCCGATGAG          | GCCGAAGAACTGACGAGAATC         | 192 |
